# Supplementary material for: Increased Blood-Reelin-Levels in First Episode Schizophrenia
Source: PubMed Central journal article supplement (PMC4549220; doi:10.1371/journal.pone.0134671), 2015-08-25
Supplement: pone.0134671.s001.pdf [file pone.0134671.s001.pdf]

| Group | Code     | Age | Medication | Education | Fam. Schiz | Fam. Psych |
|-------|----------|-----|------------|-----------|------------|------------|
| 1     | RKeli001 | 35  | 2          | 2         | 0          | 0          |
| 1     | RKeli002 | 35  | 3          | 3         | 0          | 0          |
| 1     | RKeli003 | 30  | 1          | 3         | 0          | 0          |
| 1     | RKeli004 | 30  | 2          | 2         | 0          | 1          |
| 1     | RKeli005 | 29  | 3          | 2         | 0          | 1          |
| 1     | RKeli006 | 26  | 3          | 3         | 0          | 1          |
| 1     | RKeli008 | 22  | 3          | 2         | 0          | 1          |
| 1     | RKeli009 | 22  | 3          | 3         | 0          | 0          |
| 1     | RKeli010 | 33  | 3          | 3         | 0          | 0          |
| 1     | RKeli011 | 30  | 3          | 3         | 0          | 0          |
| 1     | RKeli012 | 27  | 2          | 1         | 0          | 1          |
| 1     | RKeli013 | 24  | 3          | 1         | 0          | 1          |
| 1     | RKeli014 | 24  | 2          | 2         | 1          | 1          |
| 1     | RKeli016 | 22  | 2          | 3         | 0          | 1          |
| 1     | RKeli017 | 22  | 3          | 3         | 0          | 1          |
| 1     | RKeli018 | 21  | 3          | 2         | 0          | 0          |
| 1     | RKeli019 | 20  | 3          | 1         | 0          | 1          |
| 1     | RKeli020 | 20  | 3          | 2         | 0          | 1          |
| 2     | RKeli021 | 32  | 0          | 1         | 0          | 0          |
| 2     | RKeli022 | 31  | 0          | 2         | 0          | 0          |
| 2     | RKeli023 | 30  | 0          | 3         | 0          | 0          |
| 2     | RKeli024 | 29  | 0          | 1         | 0          | 0          |
| 2     | Rkeli025 | 29  | 0          | 3         | 0          | 0          |
| 2     | RKeli026 | 25  | 0          | 1         | 0          | 0          |
| 2     | RKeli027 | 25  | 0          | 2         | 0          | 0          |
| 2     | RKeli028 | 23  | 0          | 3         | 0          | 0          |
| 2     | RKeli029 | 22  | 0          | 2         | 0          | 0          |
| 2     | RKeli030 | 32  | 0          | 3         | 0          | 0          |
| 2     | RKeli031 | 32  | 0          | 1         | 0          | 0          |
| 2     | RKeli033 | 26  | 0          | 2         | 0          | 0          |
| 2     | RKeli034 | 25  | 0          | 3         | 0          | 0          |
| 2     | RKeli035 | 25  | 0          | 3         | 0          | 0          |
| 2     | RKeli036 | 24  | 0          | 3         | 0          | 0          |
| 2     | RKeli038 | 22  | 0          | 2         | 0          | 0          |
| 2     | RKeli039 | 21  | 0          | 3         | 0          | 0          |
| 2     | RKeli040 | 21  | 0          | 2         | 0          | 0          |

| Group | Gender | Serum_ELI | ELI_Control | 450kD WB | 340kD WB | 180kD WB |
|-------|--------|-----------|-------------|----------|----------|----------|
| 1     | 1      | 5,2       | 8,95        | 0,14     | 0,48     | 0,15     |
| 1     | 1      | 0,56      | 0,81        | 0,42     | 0,66     | 0,24     |
| 1     | 1      | 0,98      | 1,48        | 0,12     | 0,59     | 0,19     |
| 1     | 1      | 1,18      | 1,92        | 0,18     | 0,41     | 0,17     |
| 1     | 1      | 2,36      | 5,11        | 0,05     | 0,58     | 0,09     |
| 1     | 1      | 4,16      | 8,21        | 0,08     | 0,65     | 0,12     |
| 1     | 1      | 2,29      | 4,93        | 0,07     | 0,67     | 0,11     |
| 1     | 1      | 3,77      | 7,79        | 0,09     | 0,62     | 0,08     |
| 1     | 2      | 2,03      | 4,22        | 0,06     | 0,37     | 0,06     |
| 1     | 2      | 5,29      | 8,99        | 0,18     | 0,52     | 0,06     |
| 1     | 2      | 1,73      | 3,37        | 0,06     | 0,39     | 0,12     |
| 1     | 2      | 1,56      | 2,91        | 0,13     | 0,36     | 0,09     |
| 1     | 2      | 2,58      | 5,64        | 0,12     | 0,38     | 0,14     |
| 1     | 2      | 2,74      | 6,02        | 0,95     | 2,82     | 0        |
| 1     | 2      | 3,96      | 8,01        | 0,09     | 0,34     | 0,08     |
| 1     | 2      | 4,05      | 8,1         | 0,05     | 0,25     | 0,09     |
| 1     | 2      | 0         | 0           | 0        | 0        | 0        |
| 1     | 2      | 2,33      | 5,02        | 0,29     | 0,49     | 0,18     |
| 2     | 1      | 2,78      | 6,11        | 0,3      | 0,68     | 0,17     |
| 2     | 1      | 3,17      | 6,89        | 0,64     | 0,86     | 0,21     |
| 2     | 1      | 2,95      | 6,47        | 0,25     | 0,85     | 0,26     |
| 2     | 1      | 1,44      | 2,59        | 0,22     | 0,59     | 0,12     |
| 2     | 1      | 2,54      | 5,56        | 0,19     | 0,49     | 0,07     |
| 2     | 1      | 0         | 0           | 0        | 0        | 0        |
| 2     | 1      | 0,49      | 0,76        | 0,04     | 0,31     | 0,08     |
| 2     | 1      | 0         | 0           | 0        | 0        | 0        |
| 2     | 1      | 1,13      | 1,79        | 0,07     | 0,35     | 0,05     |
| 2     | 2      | 2,15      | 4,54        | 0,08     | 0,63     | 0,1      |
| 2     | 2      | 1,19      | 1,94        | 0,15     | 0,44     | 0,14     |
| 2     | 2      | 1,39      | 2,45        | 0,17     | 0,32     | 0,19     |
| 2     | 2      | 1,53      | 2,82        | 0,15     | 0,44     | 0,23     |
| 2     | 2      | 0         | 0           | 0        | 0        | 0        |
| 2     | 2      | 0,86      | 1,24        | 0,1      | 0,35     | 0,12     |
| 2     | 2      | 0         | 0           | 0        | 0        | 0        |
| 2     | 2      | 0         | 0           | 0        | 0        | 0        |
| 2     | 2      | 2,22      | 4,73        | 0,12     | 0,33     | 0,08     |

ELI=ELISA [ng/μl]

WB=Westernblot [OD]

|              |               |              |               |          |
|--------------|---------------|--------------|---------------|----------|
| Group        | 1=patients    | 2=healthy    |               |          |
| Medication   | 1=aripirazole | 2=olanzapine | 3=risperidone | 0=no med |
| Education    | 1=low         | 2=middle     | 3=high        |          |
| Fam. History | 0=no          | 1=yes        |               |          |
| Gender       | 1=f           | 2=m          |               |          |
